# Supplementary material for: Trace Element Uptake by Willows Used for the Phytoremediation of Biosolids
Source: MDPI journal article supplement (doi:10.3390/life13010243), 2023-01-16
Supplement: s1 [file s1]

Table S1. Soil chemical properties of the biosolids and biochar. Values in brackets represent the standard error of the mean (n=3 unless otherwise indicated). Adapted from Knowles et al, (2011) Gartler et al. (2013), and Taghizadeh-Toosi et al (2011).

|       | Soil            | Biosolids  | Biochar           |
|-------|-----------------|------------|-------------------|
| pH    | 5.6 (5.6 – 5.7) | 4.1        | 7.8               |
| C (%) | 3.3 (0.4)       | 28.0 (0.2) | 70.6 <sup>‡</sup> |
| N (%) | 0.22 (0.01)     | 2.7 (0.03) | 0.2 <sup>‡</sup>  |
| P     | 672 (21)        | 4683 (2)   | 412 (2)           |
| K     | 3209 (102)      | 4330 (67)  | 1713 (17)         |
| S     | 296 (8)         | 6972 (43)  | 288 (12)          |
| Ca    | 3058 (52)       | 9818 (176) | 7758 (160)        |
| Mg    | 3341 (37)       | 2204 (17)  | 605 (11)          |
| Na    | 206 (5)         | 428 (3)    | 1000 (29)         |
| As    | 3.3 (0.1)       | n.d.       | n.d.              |
| B     | 15 (1)          | n.d.       | n.d.              |
| Cd    | 0.3 (0.01)      | 2.8 (0.0)  | 0.1 (0.01)        |
| Cr    | 59 (11)         | 32 (1.4)   | 2.8 (0.6)         |
| Cu    | 15 (3)          | 561(33)    | 14 (5)            |
| Fe    | 32711 (5917)    | n.d.       | n.d.              |
| Mn    | 1188 (229)      | n.d.       | n.d.              |
| Mo    | 0.55 (0.09)     | n.d.       | n.d.              |
| Ni    | 30 (5)          | n.d.       | n.d.              |
| Pb    | 47 (8)          | 96 (3)     | 1.0 (0.2)         |
| Zn    | 59 (1)          | 878 (13)   | 16 (1.3)          |

n.d. = “not determined”

<sup>‡</sup>Single analysis on homogenised material

Gartler, Jörg, Brett Robinson, Karen Burton, and Lynne Clucas. 2013. “Carbonaceous Soil Amendments to Biofortify Crop Plants with Zinc.” *The Science of the Total Environment* 465 (November): 308–13.

Knowles, O. A., B. H. Robinson, A. Contangelo, and L. Clucas. 2011. “Biochar for the Mitigation of Nitrate Leaching from Soil Amended with Biosolids.” *The Science of the Total Environment* 409 (17): 3206–10.

Taghizadeh-Toosi, Arezoo, Tim J. Clough, Leo M. Condon, Robert R. Sherlock, Craig R. Anderson, and Robin A. Craigie. 2011. “Biochar Incorporation into Pasture Soil Suppresses in Situ Nitrous Oxide Emissions from Ruminant Urine Patches.” *Journal of Environmental Quality* 40 (2): 468–76.

Table S2: Elemental concentrations in the basal leaves (October harvest). All concentrations in mg/kg. Values in brackets represent the standard error of the mean (n=5).

|    | control           | biosolids-biochar  | biochar           | biosolids          |
|----|-------------------|--------------------|-------------------|--------------------|
| Al | 49.86 (3.32)      | 28.52 (7.45)       | 25.31 (1.95)      | 49.68 (2.72)       |
| As |                   | 2.79 (2.34)        |                   |                    |
| B  | 68.94 (3.16)      | 61.21 (4.8)        | 56.98 (2.41)      | 66.15 (1.95)       |
| Ca | 17632.03 (956.02) | 18006.93 (4336.99) | 22204.50 (971.07) | 23199.93 (617.71)  |
| Cd | 1.30 (0.04)       | 1.51 (0.3)         | 1.14 (0.11)       | 1.88 (0.1)         |
| Co | 0.47 (0.12)       | 0.67 (0.47)        | 0.15 (0.01)       | 0.21 (0.01)        |
| Cr | 0.81 (0.15)       | 1.51 (0.7)         | 0.46 (0.03)       | 0.46 (0.03)        |
| Cu | 5.17 (0.21)       | 9.27 (0.73)        | 5.46 (0.44)       | 10.46 (0.54)       |
| Fe | 54.97 (2.86)      | 44.43 (8.01)       | 44.45 (3.08)      | 52.90 (3.28)       |
| K  | 16492.74 (584.25) | 14370.55 (3825)    | 15048.56 (441.2)  | 18805.51 (1150.04) |
| Mg | 4699.70 (261.79)  | 3364.28 (877.91)   | 3907.00 (230.13)  | 5171.38 (274.54)   |
| Mn | 160.71 (9.01)     | 97.14 (19.14)      | 102.96 (7.13)     | 185.82 (6.05)      |
| Mo | 0.06              | 1.46 (0.29)        |                   | 0.87 (0.07)        |
| Na | 235.13 (22.1)     | 1042.65 (713.08)   | 297.89 (21.99)    | 355.89 (22.9)      |
| Ni | 0.70 (0.08)       | 1.66 (0.58)        | 0.36 (0.05)       | 0.96 (0.12)        |
| P  | 2340.53 (139.52)  | 2109.72 (531.15)   | 2192.72 (49.04)   | 2622.53 (120)      |
| Pb | 0.15 (0.06)       | 2.30 (2.1)         | 0.30 (0.02)       | 0.16 (0.03)        |
| S  | 2236.02 (241.56)  | 6380.62 (1471.4)   | 2841.03 (47.95)   | 8441.75 (797.44)   |
| Zn | 168.38 (14.31)    | 520.34 (36.3)      | 114.04 (7.56)     | 730.40 (47.72)     |

Table S3: Elemental concentrations in the basal leaves (November harvest). All concentrations in mg/kg. Values in brackets represent the standard error of the mean (n=5).

|    | control  |           | biosolids-biochar |           | biochar  |           | biosolids |           |
|----|----------|-----------|-------------------|-----------|----------|-----------|-----------|-----------|
| Al | 37.50    | (3.03)    | 35.36             | (2.78)    | 29.93    | (4.04)    | 40.07     | (4.98)    |
| As | 0.60     |           | 0.60              | (0.15)    | 0.43     | (0.03)    | 0.96      | (0.27)    |
| B  | 63.94    | (4.66)    | 61.10             | (3.67)    | 52.83    | (1.8)     | 53.50     | (4.16)    |
| Ca | 18561.40 | (1576.07) | 23389.76          | (977.08)  | 21839.32 | (1080.92) | 24299.22  | (1145.13) |
| Cd | 3.18     | (0.27)    | 3.34              | (0.21)    | 2.73     | (0.27)    | 3.01      | (0.15)    |
| Co | 0.24     | (0.04)    | 0.14              | (0.02)    | 0.23     | (0.03)    | 0.22      | (0.07)    |
| Cr | 0.43     | (0.03)    | 0.49              | (0.06)    | 0.58     | (0.11)    | 0.65      | (0.07)    |
| Cu | 9.78     | (0.43)    | 19.56             | (1.11)    | 11.42    | (0.67)    | 22.21     | (0.87)    |
| Fe | 90.23    | (8.4)     | 89.41             | (8.25)    | 90.12    | (2.69)    | 85.57     | (3.35)    |
| K  | 63600.46 | (5116.46) | 73766.80          | (3878.25) | 67809.12 | (3674.41) | 78095.81  | (3443.78) |
| Mg | 5379.35  | (454.44)  | 5778.07           | (179.9)   | 5619.81  | (296.28)  | 5676.30   | (290.31)  |
| Mn | 169.87   | (17.03)   | 161.71            | (9.8)     | 158.36   | (8.65)    | 178.53    | (12.67)   |
| Mo | 0.24     | (0.05)    | 0.88              | (0.1)     | 0.26     | (0.03)    | 0.62      | (0.04)    |
| Na | 98.16    | (8.26)    | 158.13            | (14.57)   | 147.67   | (27.55)   | 184.94    | (17.54)   |
| Ni | 0.89     | (0.08)    | 1.20              | (0.16)    | 0.83     | (0.11)    | 1.66      | (0.24)    |
| P  | 4191.67  | (329.2)   | 4764.06           | (209.58)  | 4704.63  | (162.49)  | 5015.08   | (233.06)  |
| Pb |          |           |                   |           |          |           | 0.42      |           |
| S  | 4875.95  | (612.02)  | 14785.52          | (980.13)  | 7884.88  | (224.24)  | 15389.57  | (760.49)  |
| Zn | 158.02   | (11.98)   | 451.76            | (13.81)   | 145.13   | (7.2)     | 600.57    | (36.07)   |

Table S4: Elemental concentrations in the basal leaves (December harvest). All concentrations in mg/kg. Values in brackets represent the standard error of the mean (n=5).

|    | control  |           | biosolids-biochar |           | biochar  |           | biosolids |           |
|----|----------|-----------|-------------------|-----------|----------|-----------|-----------|-----------|
| Al | 96.56    | (18.12)   | 84.95             | (13.25)   | 62.43    | (13.2)    | 102.75    | (15.73)   |
| As | 0.21     | (0.08)    | 0.39              | (0.05)    | 0.43     | (0.05)    | 0.48      | (0.08)    |
| B  | 111.41   | (11.85)   | 104.93            | (5.81)    | 107.01   | (3.12)    | 116.46    | (10.67)   |
| Ca | 20388.31 | (1745.45) | 29472.72          | (2563.37) | 28751.19 | (2745.93) | 29980.84  | (1372.96) |
| Cd | 1.76     | (0.14)    | 3.16              | (0.24)    | 1.79     | (0.23)    | 2.94      | (0.16)    |
| Co | 0.35     | (0.02)    | 0.15              | (0.02)    | 0.29     | (0.08)    | 0.36      | (0.05)    |
| Cr | 0.78     | (0.13)    | 1.07              | (0.27)    | 0.84     | (0.1)     | 0.92      | (0.12)    |
| Cu | 4.94     | (0.49)    | 9.49              | (1.49)    | 5.21     | (0.33)    | 10.06     | (0.43)    |
| Fe | 97.79    | (21.45)   | 101.07            | (17.77)   | 78.71    | (8.8)     | 97.58     | (20.77)   |
| K  | 13683.66 | (1242.92) | 13375.16          | (916.44)  | 11100.49 | (1063.56) | 12752.38  | (748.34)  |
| Mg | 5410.35  | (450.59)  | 5599.35           | (470.8)   | 4861.71  | (553.96)  | 6674.34   | (398.89)  |
| Mn | 206.74   | (16.55)   | 181.01            | (11.89)   | 146.68   | (15.82)   | 313.87    | (20.94)   |
| Mo | 0.26     | (0.05)    | 1.44              | (0.15)    | 0.26     | (0.02)    | 1.25      | (0.11)    |
| Na | 247.49   | (31.39)   | 369.11            | (40.55)   | 328.27   | (32.35)   | 396.81    | (23.24)   |
| Ni | 0.73     | (0.07)    | 1.37              | (0.11)    | 0.74     | (0.11)    | 1.71      | (0.22)    |
| P  | 1802.87  | (136.44)  | 3010.95           | (739.33)  | 1725.46  | (70.88)   | 2900.67   | (170.23)  |
| Pb | 0.44     | (0.04)    | 0.46              | (0.09)    | 0.41     | (0.07)    | 0.38      | (0.09)    |
| S  | 2343.17  | (143.16)  | 8785.25           | (1402.69) | 3188.91  | (253.29)  | 10448.80  | (936.97)  |
| Zn | 271.42   | (20.6)    | 925.42            | (66.66)   | 211.06   | (17.38)   | 1185.59   | (96.1)    |

Table S5: Elemental concentrations in the basal leaves (final harvest). All concentrations in mg/kg. Values in brackets represent the standard error of the mean (n=5).

| mg*kg <sup>-1</sup> | control            | biosolids-biochar  | biochar           | biosolids          |
|---------------------|--------------------|--------------------|-------------------|--------------------|
| Al                  | 111.35 (19.3)      | 120.18 (14.4)      | 114.32 (12.33)    | 140.03 (18.2)      |
| As                  | 0.48 (0.12)        | 0.35 (0.05)        | 0.30 (0.03)       | 0.77               |
| B                   | 99.93 (7.25)       | 92.54 (5.84)       | 95.24 (4.55)      | 101.00 (2.8)       |
| Ca                  | 19692.38 (2027.57) | 23680.85 (1086.48) | 24580.81 (635.16) | 24956.23 (1052.68) |
| Cd                  | 1.76 (0.16)        | 2.59 (0.12)        | 1.49 (0.09)       | 2.43 (0.14)        |
| Co                  | 0.37 (0.04)        | 0.16 (0.06)        | 0.15 (0.01)       | 0.25 (0.02)        |
| Cr                  | 1.95 (0.3)         | 2.62 (0.53)        | 2.68 (0.28)       | 2.24 (0.48)        |
| Cu                  | 4.84 (0.47)        | 9.16 (1.23)        | 5.04 (0.22)       | 10.04 (0.63)       |
| Fe                  | 122.98 (18.51)     | 151.15 (17.42)     | 151.21 (17.33)    | 152.64 (19.25)     |
| K                   | 14921.74 (698.95)  | 17151.02 (1202.03) | 14160.19 (456.3)  | 16445.85 (774.71)  |
| Li                  | 0.24 (0.04)        | 0.40 (0.14)        | 0.42 (0.1)        |                    |
| Mg                  | 4803.65 (430.08)   | 4651.88 (142.92)   | 4138.65 (202.3)   | 5751.21 (157.08)   |
| Mn                  | 209.79 (18.59)     | 162.68 (8.98)      | 128.93 (7.45)     | 290.50 (13.86)     |
| Mo                  | 0.24 (0.03)        | 1.44 (0.14)        | 0.25 (0.01)       | 1.40 (0.15)        |
| Na                  | 200.42 (25.47)     | 271.18 (22.59)     | 262.41 (22.5)     | 286.56 (11.97)     |
| Ni                  | 0.98 (0.12)        | 1.80 (0.25)        | 1.15 (0.08)       | 2.13 (0.56)        |
| P                   | 1722.55 (152.29)   | 2968.27 (565.18)   | 1656.55 (123.13)  | 2960.78 (175.21)   |
| Pb                  | 0.35 (0.03)        | 0.36 (0.1)         | 0.26 (0.05)       | 0.30 (0.06)        |
| S                   | 2031.32 (177.9)    | 7200.44 (751.52)   | 2645.08 (140.42)  | 8738.60 (679.77)   |
| Zn                  | 267.99 (21.71)     | 812.24 (40.51)     | 206.12 (10.92)    | 1068.75 (71.95)    |

Table S6: Elemental concentrations in the apical leaves (final harvest). All concentrations in mg/kg. Values in brackets represent the standard error of the mean (n=5).

| mg*kg <sup>-1</sup> | control            | biosolids-biochar  | biochar           | biosolids          |
|---------------------|--------------------|--------------------|-------------------|--------------------|
| Al                  | 60.99 (8.79)       | 70.52 (7.83)       | 65.77 (5.45)      | 61.21 (4.46)       |
| As                  | 0.17               | 0.35 (0.14)        | 0.24 (0.03)       | 0.32 (0.04)        |
| B                   | 85.16 (7.83)       | 88.38 (5.56)       | 87.41 (11.4)      | 75.73 (9.76)       |
| Ca                  | 9154.56 (964.23)   | 11781.52 (1027.5)  | 11597.59 (856.05) | 9551.65 (1439.33)  |
| Cd                  | 1.58 (0.18)        | 1.37 (0.13)        | 1.50 (0.15)       | 1.15 (0.11)        |
| Co                  | 0.39 (0.05)        | 0.07 (0.01)        | 0.14 (0.02)       | 0.24 (0.04)        |
| Cr                  | 1.22 (0.07)        | 1.40 (0.2)         | 1.57 (0.22)       | 1.10 (0.12)        |
| Cu                  | 7.64 (1.76)        | 12.49 (0.96)       | 7.83 (0.79)       | 16.43 (2.6)        |
| Fe                  | 106.48 (9.84)      | 120.50 (13.16)     | 115.53 (6.49)     | 106.32 (2.33)      |
| K                   | 22177.46 (6164.94) | 19376.28 (1995.26) | 17364.45 (937.81) | 22590.03 (1630.64) |
| Li                  | 0.09 (0.01)        | 0.11 (0.02)        | 0.12 (0.02)       |                    |
| Mg                  | 3511.67 (191.02)   | 3540.52 (104.2)    | 3232.94 (182.61)  | 3516.90 (277.42)   |
| Mn                  | 109.91 (12.11)     | 85.99 (11.4)       | 60.12 (5.34)      | 123.12 (16.67)     |
| Mo                  | 0.20 (0.02)        | 0.76 (0.06)        | 0.20 (0.02)       | 0.80 (0.14)        |
| Na                  | 88.87 (7.23)       | 109.13 (8.29)      | 109.99 (12.06)    | 105.39 (15.16)     |
| Ni                  | 1.88 (0.49)        | 2.34 (0.34)        | 1.59 (0.14)       | 3.38 (0.75)        |
| P                   | 2600.99 (665.27)   | 2851.61 (204.35)   | 2182.00 (326.14)  | 3662.91 (417.35)   |
| Pb                  | 0.16 (0.06)        | 0.36 (0.01)        | 0.41 (0.14)       | 0.21 (0.03)        |
| S                   | 2855.19 (319.06)   | 5147.40 (148.57)   | 3022.64 (113.76)  | 5701.31 (375.33)   |
| Zn                  | 145.78 (17.23)     | 348.58 (30.99)     | 119.46 (10.08)    | 376.92 (76.05)     |

Table S7: Elemental concentrations in the medial leaves (final harvest). All concentrations in mg/kg. Values in brackets represent the standard error of the mean (n=5).

| mg*kg <sup>-1</sup> | control           | biosolids-biochar  | biochar           | biosolids          |
|---------------------|-------------------|--------------------|-------------------|--------------------|
| Al                  | 127.47 (18.29)    | 113.88 (10.8)      | 113.66 (5.09)     | 114.26 (13.26)     |
| As                  | 0.25 (0.04)       | 0.41 (0.07)        | 0.37 (0.03)       | 0.37 (0.1)         |
| B                   | 97.12 (2.4)       | 121.33 (5.51)      | 93.63 (24.59)     | 93.36 (3.3)        |
| Ca                  | 16652.71 (713.13) | 18575.02 (1170.85) | 19619.91 (796.14) | 20279.20 (510.43)  |
| Cd                  | 1.79 (0.14)       | 2.09 (0.1)         | 1.08 (0.28)       | 2.05 (0.1)         |
| Co                  | 0.32 (0.02)       | 0.07 (0.01)        | 0.12 (0.01)       | 0.23 (0.02)        |
| Cr                  | 2.28 (0.46)       | 2.50 (0.44)        | 2.00 (0.3)        | 1.83 (0.33)        |
| Cu                  | 4.94 (0.4)        | 9.12 (0.85)        | 5.71 (0.26)       | 10.68 (0.76)       |
| Fe                  | 138.16 (18.26)    | 152.11 (15.16)     | 166.94 (8.82)     | 136.59 (12.02)     |
| K                   | 15039.95 (506.38) | 17154.72 (959.72)  | 14856.36 (934.64) | 15148.22 (1121.28) |
| Li                  | 0.15 (0.01)       | 0.29 (0.07)        | 0.25 (0.03)       |                    |
| Mg                  | 4472.46 (193.44)  | 4145.45 (154.96)   | 3578.64 (102.78)  | 5137.54 (246.17)   |
| Mn                  | 195.78 (9.52)     | 136.65 (4.86)      | 114.42 (6.15)     | 261.58 (13.59)     |
| Mo                  | 0.21 (0.02)       | 1.29 (0.16)        | 0.31 (0.04)       | 1.25 (0.15)        |
| Na                  | 149.72 (8.52)     | 208.09 (17.02)     | 203.55 (9.7)      | 199.66 (7.09)      |
| Ni                  | 0.94 (0.13)       | 1.75 (0.17)        | 1.05 (0.13)       | 1.85 (0.27)        |
| P                   | 1811.02 (152.58)  | 2801.21 (337.59)   | 1676.64 (38.09)   | 2968.35 (141.31)   |
| Pb                  | 0.33 (0.05)       | 0.47 (0.09)        | 0.35 (0.1)        | 0.33 (0.12)        |
| S                   | 2118.23 (130.37)  | 6492.21 (624.63)   | 2485.02 (121.65)  | 7196.91 (548.21)   |
| Zn                  | 262.28 (15.55)    | 686.61 (65.56)     | 161.06 (42.21)    | 859.30 (43.47)     |

Table S8: Elemental concentrations in the basal shoots (final harvest). All concentrations in mg/kg. Values in brackets represent the standard error of the mean (n=5).

| mg*kg <sup>-1</sup> | control |          | biosolids-biochar |          | biochar |          | biosolids |          |
|---------------------|---------|----------|-------------------|----------|---------|----------|-----------|----------|
| Al                  | 83.66   | (6.53)   | 101.69            | (8.19)   | 102.53  | (9.11)   | 99.20     | (8.88)   |
| As                  |         |          |                   |          | 0.21    | (0.08)   | 0.23      | (0.01)   |
| B                   | 17.06   | (1.89)   | 15.64             | (1.08)   | 18.23   | (1.39)   | 15.84     | (0.81)   |
| Ca                  | 7640.49 | (455.48) | 9100.80           | (624.75) | 9917.15 | (356.53) | 8927.04   | (342.23) |
| Cd                  | 2.43    | (0.16)   | 2.38              | (0.13)   | 2.29    | (0.11)   | 2.12      | (0.12)   |
| Co                  | 0.07    | (0.01)   |                   |          | 0.04    | (0.01)   | 0.09      | (0.03)   |
| Cr                  | 1.48    | (0.19)   | 1.74              | (0.17)   | 1.41    | (0.15)   | 1.74      | (0.14)   |
| Cu                  | 3.74    | (0.35)   | 8.77              | (0.46)   | 3.82    | (0.19)   | 12.49     | (0.46)   |
| Fe                  | 61.86   | (9.43)   | 64.26             | (4.79)   | 64.26   | (6.21)   | 63.83     | (4.43)   |
| K                   | 4913.24 | (390.14) | 4905.23           | (684.16) | 5804.44 | (229.73) | 6198.79   | (151.88) |
| Li                  | 0.11    |          | 0.12              |          | 0.12    |          |           |          |
| Mg                  | 920.69  | (55.55)  | 934.64            | (54.03)  | 886.68  | (58.88)  | 1157.97   | (39.87)  |
| Mn                  | 84.57   | (11.58)  | 63.65             | (3.45)   | 60.20   | (4.52)   | 105.04    | (5.72)   |
| Mo                  | 0.09    | (0.02)   | 0.14              | (0.02)   | 0.14    | (0.05)   | 0.14      | (0.01)   |
| Na                  | 390.96  | (61.62)  | 471.54            | (31.32)  | 480.62  | (24.38)  | 490.71    | (9.53)   |
| Ni                  | 0.68    | (0.08)   | 0.98              | (0.17)   | 0.63    | (0.07)   | 2.20      | (1.01)   |
| P                   | 1095.98 | (54.91)  | 1390.78           | (19.59)  | 1124.72 | (28.24)  | 1517.36   | (57.65)  |
| Pb                  | 0.41    | (0.2)    | 0.25              | (0.01)   | 0.35    | (0.04)   | 0.23      | (0.03)   |
| S                   | 629.59  | (27.49)  | 1054.54           | (85.49)  | 777.38  | (55.04)  | 1190.98   | (54.33)  |
| Zn                  | 145.33  | (7.82)   | 293.45            | (19.19)  | 126.71  | (5.72)   | 348.18    | (22.57)  |



Table S9: Elemental concentrations in the medial shoots (final harvest). All concentrations in mg/kg. Values in brackets represent the standard error of the mean (n=5).

| mg*kg <sup>-1</sup> | control          | biosolids-biochar | biochar          | biosolids        |
|---------------------|------------------|-------------------|------------------|------------------|
| Al                  | 44.84 (1.45)     | 42.67 (2.74)      | 44.59 (2.12)     | 41.59 (2.31)     |
| As                  | 0.16 (0.03)      | 0.37              | 0.20 (0.05)      | 0.19 (0.03)      |
| B                   | 13.76 (0.49)     | 12.40 (0.3)       | 13.81 (0.27)     | 12.86 (0.6)      |
| Ca                  | 5369.16 (173.13) | 6323.68 (245.6)   | 7599.00 (708.67) | 5641.73 (303.05) |
| Cd                  | 2.01 (0.03)      | 1.78 (0.03)       | 1.85 (0.11)      | 1.48 (0.09)      |
| Co                  | 0.07             | 0.03 (0.01)       | 0.03             | 0.05             |
| Cr                  | 0.75 (0.11)      | 0.73 (0.07)       | 0.76 (0.04)      | 0.73 (0.16)      |
| Cu                  | 3.31 (0.13)      | 8.38 (0.27)       | 3.84 (0.23)      | 10.50 (0.37)     |
| Fe                  | 26.14 (1.66)     | 25.60 (2.75)      | 28.49 (1.92)     | 24.35 (1.86)     |
| K                   | 5808.78 (101.51) | 5299.18 (473.79)  | 5937.23 (258.17) | 6260.41 (113.34) |
| Li                  | 0.10             | 0.11 (0.01)       | 0.12 (0.01)      |                  |
| Mg                  | 825.29 (32.28)   | 810.12 (62.43)    | 768.61 (65.07)   | 964.30 (38.36)   |
| Mn                  | 56.98 (0.93)     | 36.44 (2.37)      | 32.90 (1.79)     | 62.29 (4.21)     |
| Mo                  | 0.05 (0.01)      | 0.12 (0.01)       | 0.08 (0.02)      | 0.12 (0.02)      |
| Na                  | 295.68 (17.05)   | 345.79 (17.19)    | 385.32 (30.59)   | 304.83 (10.25)   |
| Ni                  | 0.44 (0.14)      | 0.63 (0.15)       | 0.49 (0.06)      | 0.47 (0.12)      |
| P                   | 1200.15 (29.4)   | 1568.59 (67.27)   | 1239.87 (19.86)  | 1549.11 (58.62)  |
| Pb                  | 0.18 (0.06)      | 0.30 (0.04)       | 0.32 (0.02)      | 0.33 (0.03)      |
| S                   | 723.35 (3.57)    | 1181.03 (41.41)   | 841.27 (27.93)   | 1254.22 (59.99)  |
| Zn                  | 105.93 (5.05)    | 229.59 (4.08)     | 87.15 (7.14)     | 253.96 (23)      |

Table S10: Elemental concentrations in the apical shoots (final harvest). All concentrations in mg/kg. Values in brackets represent the standard error of the mean (n=5).

| mg*kg <sup>-1</sup> | control            | biosolids-biochar  | biochar            | biosolids          |
|---------------------|--------------------|--------------------|--------------------|--------------------|
| Al                  | 50.18 (3.91)       | 47.49 (3.32)       | 48.47 (1.65)       | 52.68 (3.15)       |
| As                  | 0.00 (0)           | 0.11 (0)           | 0.17 #DIV/0!       | 0.62 (0.41)        |
| B                   | 25.38 (3.11)       | 20.94 (1.62)       | 24.00 (1.65)       | 28.47 (2.49)       |
| Ca                  | 5487.46 (436.35)   | 6401.78 (410.83)   | 6411.98 (645.39)   | 5464.03 (425.65)   |
| Cd                  | 2.45 (0.16)        | 1.99 (0.13)        | 2.18 (0.23)        | 1.72 (0.12)        |
| Co                  | 0.09 (0.01)        | 0.05 (0.01)        | 0.10 (0.04)        | 0.09 (0.02)        |
| Cr                  | 0.95 (0.22)        | 0.87 (0.07)        | 0.72 (0.09)        | 0.81 (0.07)        |
| Cu                  | 4.65 (0.27)        | 9.87 (0.48)        | 4.80 (0.66)        | 13.41 (1.1)        |
| Fe                  | 38.35 (7.33)       | 34.67 (4.08)       | 32.59 (2.14)       | 39.62 (3.83)       |
| K                   | 11264.24 (1195.07) | 12291.24 (1116.43) | 14707.45 (1636.11) | 16900.30 (2198.87) |
| Li                  | 0.12 (0.02)        | 0.12 (0.01)        | 0.12 (0.01)        |                    |
| Mg                  | 1168.81 (53.12)    | 1259.31 (171.46)   | 1036.40 (5.51)     | 1656.45 (285.58)   |
| Mn                  | 64.10 (8.73)       | 42.77 (4.72)       | 39.03 (5.44)       | 67.29 (9.4)        |
| Mo                  | 0.27 (0.09)        | 0.29 (0.06)        | 0.15 (0.03)        | 0.33 (0.02)        |
| Na                  | 465.55 (74.26)     | 418.95 (48.28)     | 476.98 (69.2)      | 424.17 (26.49)     |
| Ni                  | 1.29 (0.61)        | 1.05 (0.36)        | 0.72 (0.19)        | 1.46 (0.15)        |
| P                   | 1801.26 (69.8)     | 2370.40 (167.39)   | 1997.32 (262.16)   | 2913.85 (114.11)   |
| Pb                  | 0.35 (0.04)        | 0.61 (0.05)        | 0.53 (0.07)        | 0.72 (0.23)        |
| S                   | 1609.27 (91.58)    | 2789.42 (345.83)   | 1800.87 (243.01)   | 3505.61 (201.45)   |
| Zn                  | 118.57 (16.95)     | 256.64 (29.51)     | 98.48 (15.25)      | 274.66 (36.73)     |

Table S11: Elemental concentrations in the roots (final harvest). All concentrations in mg/kg. Values in brackets represent the standard error of the mean (n=5).

| mg*kg <sup>-1</sup> | control          | biosolids-biochar | biochar          | biosolids        |
|---------------------|------------------|-------------------|------------------|------------------|
| Al                  | 1057.67 (127.32) | 934.35 (109.99)   | 556.04 (71.54)   | 1316.91 (234.17) |
| As                  | 0.43 (0.09)      | 0.60 (0.14)       | 0.30 (0.05)      | 0.90 (0.2)       |
| B                   | 10.58 (0.29)     | 9.80 (0.33)       | 10.27 (0.52)     | 9.76 (0.67)      |
| Ca                  | 6743.39 (343.84) | 6203.10 (196.62)  | 7192.43 (156.73) | 5561.70 (222.91) |
| Cd                  | 0.70 (0.05)      | 0.94 (0.04)       | 0.65 (0.05)      | 1.01 (0.11)      |
| Co                  | 0.33 (0.06)      | 0.23 (0.03)       | 0.18 (0.03)      | 0.34 (0.08)      |
| Cr                  | 5.06 (0.86)      | 7.14 (0.64)       | 2.80 (0.34)      | 11.73 (3.51)     |
| Cu                  | 6.51 (0.36)      | 23.11 (1.45)      | 7.31 (0.36)      | 40.74 (9.15)     |
| Fe                  | 716.72 (93.55)   | 632.39 (56.79)    | 431.34 (54.92)   | 1479.10 (536.64) |
| K                   | 8513.74 (647.1)  | 7803.31 (692.95)  | 8777.30 (380.74) | 8193.41 (869.03) |
| Li                  | 0.18 (0.06)      | 0.12 (0.07)       | 0.05 (0.01)      |                  |
| Mg                  | 1491.13 (116.36) | 1380.64 (61.68)   | 1396.14 (96.95)  | 1488.04 (95.36)  |
| Mn                  | 84.12 (10.87)    | 75.13 (6.52)      | 50.42 (3.24)     | 149.46 (39.89)   |
| Mo                  | 0.19 (0.05)      | 2.07 (0.11)       | 0.22 (0.03)      | 2.68 (0.6)       |
| Na                  | 691.14 (89.86)   | 755.11 (54.06)    | 708.80 (83.22)   | 592.20 (83.24)   |
| Ni                  | 2.93 (0.31)      | 4.41 (0.38)       | 2.04 (0.23)      | 6.91 (1.51)      |
| P                   | 2492.37 (77.9)   | 2904.51 (102.77)  | 2579.76 (106.29) | 3072.89 (169.96) |
| Pb                  | 0.91 (0.14)      | 1.52 (0.16)       | 0.48 (0.09)      | 3.42 (1.21)      |
| S                   | 1700.19 (176.72) | 2858.76 (168.66)  | 1834.21 (118)    | 3259.28 (451.51) |
| Zn                  | 73.13 (4.61)     | 213.27 (6.6)      | 60.86 (4)        | 282.45 (34.81)   |
